# Supplementary material for: Berberine Inhibits Invasion and Metastasis of Colorectal Cancer Cells via COX-2/PGE2 Mediated JAK2/STAT3 Signaling Pathway
Source: PLOS journal article supplement (doi:10.1371/journal.pone.0123478), 2015-05-08
Supplement: S2 (10.1371/journal.pone.0123478.s002) [file journal.pone.0123478.s002]

**S1 Table Effect of berberin on liver and kidney functions (means±SD)**.

|  | Treatment | n | ALT(U/L) | AST(U/L) | CT(μmol/L) | UN(mmol/L) |
| --- | --- | --- | --- | --- | --- | --- |
| SW620 | 0 mg/kg | 6 | 42.81±6.23 | 69.37±7.49 | 14.56±1.02 | 7.831±0.78 |
| 200 mg/kg | 6 | 41.02±6.31△ | 70.51±8.64△ | 13.62±0.87△ | 8.51±0.96△ |
| LoVo | 0 mg/kg | 6 | 43.10±4.70 | 68.75±7.14 | 14.13±0.65 | 7.79±0.67 |
| 200 mg/kg | 6 | 42.76±5.23△ | 68.39±7.46△ | 13.91±0.81△ | 7.41±0.86△ |

△: *P*>0.05 control *vs* treated
